# Supplementary material
Source: Copernicus journal article supplement (doi:10.5194/egusphere-2026-2809)
Supplement: Supplementary file 1 [file egusphere-2026-2809-supplement.pdf]

Supplemental materials for: Permafrost thaw reshapes methane cycling across an interior Alaska peatland

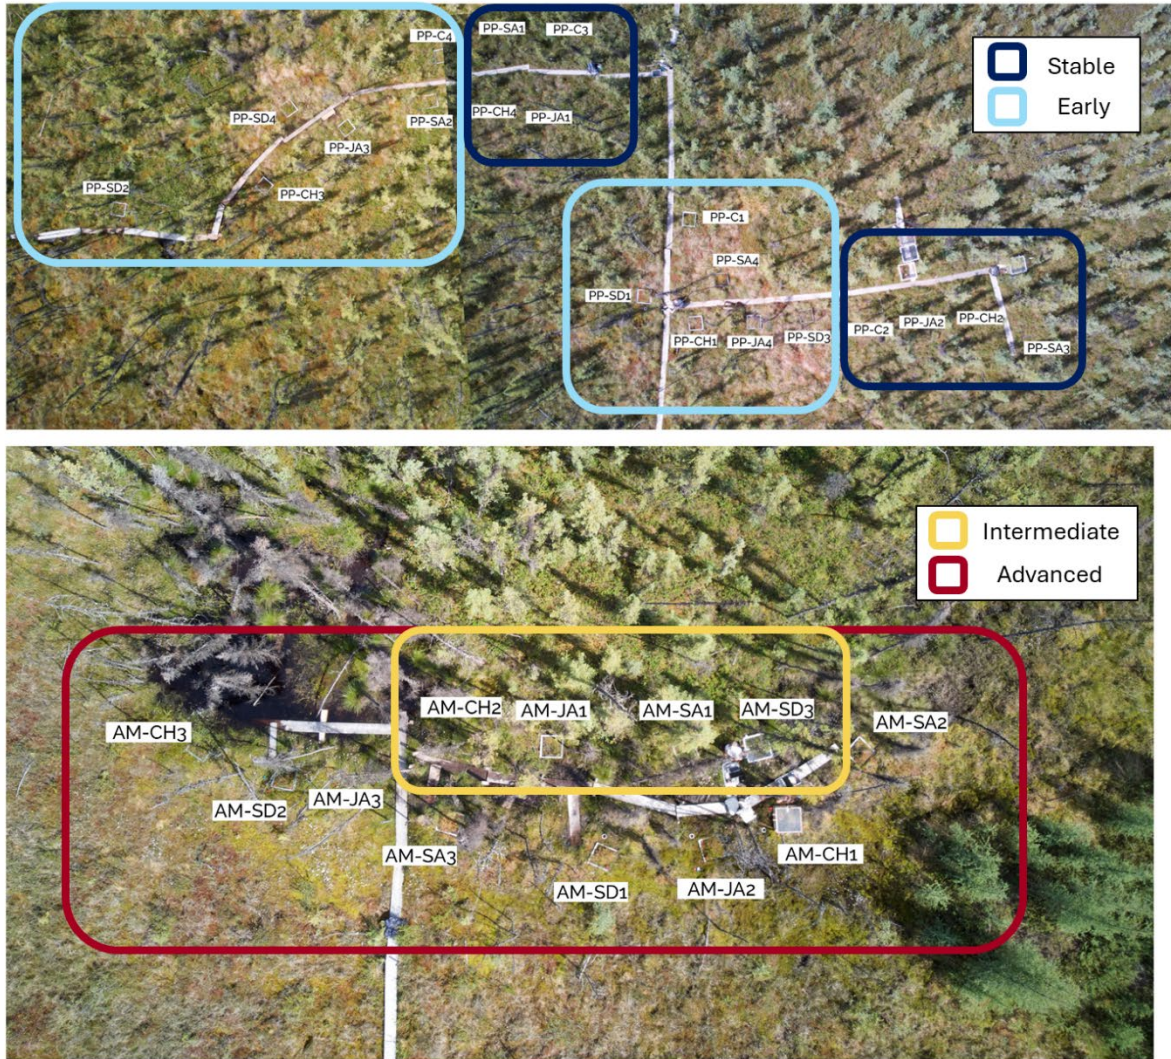

**Figure S1.** Drone image of the APEX Beta site showing soil collars experiencing stable to early-stage thawing permafrost in the PP (top) and intermediate- to advanced- stage permafrost thaw in the AM (bottom). Thaw stages are outlined to show the spatial distribution of stable, early, intermediate, and advanced permafrost thaw at the site. Cox et al. (2025) also used this photo in their publication. Photo credit: Evan Schijns.

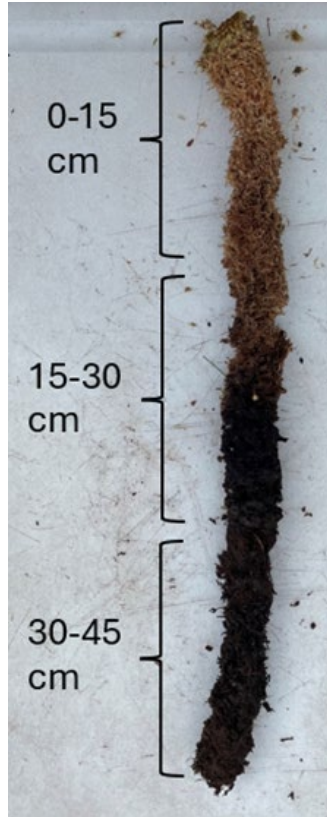

**Figure S2.** Soil core from the permafrost plateau showing the three depth intervals (shallow, intermediate, and deep) used for sectioning each core.

**Table S1.** Summary of environmental variables across the permafrost plateau and active thaw margin grouped by thaw stages. Mean values are provided with the associated standard error.

| Site               | Thaw stage   | Water table depth below the ground surface (cm) | Seasonal thaw depth (cm) | Soil temperature (°C) | Soil moisture (%) |
|--------------------|--------------|-------------------------------------------------|--------------------------|-----------------------|-------------------|
| Permafrost Plateau | Stable       | 22.4 ± 0.1                                      | 33.1 ± 0.1               | 11.0 ± 0.1            | 24.3 ± 2.3        |
|                    | Early        | 24.7 ± 0.1                                      | 43.0 ± 0.2               | 12.3 ± 0.05           | 25.9 ± 3.6        |
| Active Thaw Margin | Intermediate | 1.8 ± 0.6                                       | 57.2 ± 0.9               | 12.8 ± 0.1            | 26.0 ± 2.6        |
|                    | Advanced     | 4.7 ± 0.1                                       | 111.7 ± 0.7              | 15.1 ± 0.04           | 36.3 ± 7.9        |

**Table S2.** Summary of mean CO<sub>2</sub> and CH<sub>4</sub> flux values across the permafrost plateau and active thaw margin grouped by thaw stages. These represent mean flux values taken over three sampling campaigns in July 2022. Mean values are provided with the associated standard error.

| Site               | Thaw Stage   | CO <sub>2</sub> flux (μmol m <sup>-2</sup> s <sup>-1</sup> ) | CH <sub>4</sub> flux (μmol m <sup>-2</sup> min <sup>-1</sup> ) |
|--------------------|--------------|--------------------------------------------------------------|----------------------------------------------------------------|
| Permafrost Plateau | Stable       | 1.0 ± 0.8                                                    | -0.1 ± 0.02                                                    |
|                    | Early        | 0.3 ± 0.8                                                    | 3.8 ± 1.0                                                      |
| Active Thaw Margin | Intermediate | -1.3 ± 1.1                                                   | 19.3 ± 9.6                                                     |
|                    | Advanced     | -1.6 ± 0.4                                                   | 40.2 ± 12.0                                                    |

### 1.1 – Basic PCR for inhibitor testing

A basic 16S rRNA PCR was performed on random samples to test for the presence of PCR inhibitors. The following PCR conditions were used:

#### PCR Conditions

| Component             | Vol per 25 µl reaction (µl) |
|-----------------------|-----------------------------|
| 2X Phusion Master Mix | 12.5                        |
| 515F (10 mM)          | 0.5                         |
| 896R (10 mM)          | 0.5                         |
| Molecular Grade Water | 9.5                         |
| Template*             | 2                           |

\*E. coli gDNA was used as a positive control and molecular grade water was used as a negative control.

#### Thermal Cycler Conditions

| Temperature | Time   | Cycles |
|-------------|--------|--------|
| 95°C        | 4 min  | 1      |
| 95°C        | 45 sec | 30     |
| 50°C        | 30 sec |        |
| 72°C        | 90 sec |        |
| 72°C        | 10 min |        |
| 4°C         | ---    | 1      |

The presence of a strong positive band was used to indicate that the DNA extracts did not contain any significant PCR inhibitor.

#### P5-P7 PCR Assay

A basic PCR assay was used with primers designed the anneal to the P5 and P7 Illumina Adapters

Illumina P5 primer:

5'-AATGATACGGCGACCACCGAGATC-3'

Illumine P7 primer:

5'-CAAGCAGAAGACGGCATAACGAG-3'

#### PCR Conditions

| Component             | Vol per 25 µl reaction (µl) |
|-----------------------|-----------------------------|
| 2X Phusion Master Mix | 12.5                        |
| P5 (10 mM)            | 0.5                         |
| P7 (10 mM)            | 0.5                         |
| Molecular Grade Water | 9.5                         |
| Template*             | 2                           |

\* Molecular grade water was used as a negative control

#### Thermal Cycler Conditions

| Temperature | Time   | Cycles |
|-------------|--------|--------|
| 95°C        | 4 min  | 1      |
| 95°C        | 45 sec | 30     |
| 50°C        | 30 sec |        |
| 72°C        | 90 sec |        |
| 72°C        | 10 min |        |
| 4°C         | ---    | 1      |

A strong band at the target size was used to indicate that the appropriate illumina primers were present.

iTru Adapters and Limit Cycle PCR

The mcrA\_F and mcrA\_R primers were modified by adding 5' iTru adaptors based on the Adapterama II: TaggiMatrix protocol (Glenn et al., 2019) to make iTru Fusion primers without internal indexes. See Glenn et al for details.

Barcoded iTru5 and iTru7 adapters were then ordered from BadDNA (<https://baddna.uga.edu/webstore>).

A 2 step PCR assay was then used to amplify and barcode each sample. The first PCR used the fusion primers and the second PCR attached the barcoded iTru adapters.

PCR 1

PCR Conditions

| Component             | Vol per 25 µl reaction (µl) |
|-----------------------|-----------------------------|
| 2X Phusion Master Mix | 12.5                        |
| P5 (10 mM)            | 0.5                         |
| P7 (10 mM)            | 0.5                         |
| Molecular Grade Water | 9.5                         |
| Template*             | 2                           |

\* Molecular grade water was used as a negative control

Thermal Cycler Conditions

| Temperature | Time   | Cycles |
|-------------|--------|--------|
| 95°C        | 4 min  | 1      |
| 95°C        | 45 sec | 30     |
| 50°C        | 30 sec |        |
| 72°C        | 90 sec |        |
| 72°C        | 10 min | 1      |
| 4°C         | ---    |        |

PCR 2

PCR Conditions

| Component             | Vol per 25 µl reaction (µl) |
|-----------------------|-----------------------------|
| 2X Phusion Master Mix | 12.5                        |
| P5 (10 mM)            | 0.5                         |
| P7 (10 mM)            | 0.5                         |
| Molecular Grade Water | 9.5                         |
| Template*             | 2                           |

\* Molecular grade water was used as a negative control

Thermal Cycler Conditions

| Temperature | Time   | Cycles |
|-------------|--------|--------|
| 95°C        | 4 min  | 1      |
| 95°C        | 45 sec | 8      |
| 50°C        | 30 sec |        |
| 72°C        | 90 sec |        |
| 72°C        | 10 min | 1      |
| 4°C         | ---    |        |

## Qubit data results 16S

| Sample ID    | Site               | Depth (cm) | DNA concentration (ng/ $\mu$ L) |
|--------------|--------------------|------------|---------------------------------|
| AM_SD1_0_15  | Active thaw margin | 0-15       | 10.214                          |
| AM_SD1_15_30 | Active thaw margin | 15-30      | 15.826                          |
| PP_C4_0_15   | Permafrost Plateau | 0-15       | 14.557                          |
| PP_SD2_30_37 | Permafrost Plateau | 30-37      | 17.234                          |
| AM_JA1_42_48 | Active thaw margin | 42-48      | 18.614                          |
| PP_SD3_30_45 | Permafrost Plateau | 30-45      | 15.676                          |
| AM_SD1_30_42 | Active thaw margin | 30-42      | 20.461                          |
| PP_JA3_0_15  | Permafrost Plateau | 0-15       | 37.821                          |
| PP_SA1_15_30 | Permafrost Plateau | 15-30      | 71.648                          |
| PP_C2_15_25  | Permafrost Plateau | 15-25      | 61.921                          |
| PP_SD1_0_15  | Permafrost Plateau | 0-15       | 77.363                          |
| AM_CH1_0_15  | Active thaw margin | 0-15       | 72.927                          |
| AM_SA1_0_15  | Active thaw margin | 0-15       | 62.732                          |
| PP_C4_30_35  | Permafrost Plateau | 30-35      | 60.493                          |
| PP_C3_0_15   | Permafrost Plateau | 0-15       | 79.827                          |
| PP_C3_15_30  | Permafrost Plateau | 15-30      | 42.983                          |
| PP_JA3_30_38 | Permafrost Plateau | 30-38      | 53.781                          |
| PP_JA2_15_25 | Permafrost Plateau | 15-25      | 71.523                          |
| PP_C1_15_30  | Permafrost Plateau | 15-30      | 79.638                          |
| PP_C1_30_40  | Permafrost Plateau | 30-40      | 72.875                          |
| PP_CH4_0_15  | Permafrost Plateau | 0-15       | 77.328                          |
| PP_CH4_15_30 | Permafrost Plateau | 15-30      | 66.86                           |
| PP_CH4_30_35 | Permafrost Plateau | 30-35      | 72.746                          |
| PP_SA2_0_15  | Permafrost Plateau | 0-15       | 76.593                          |
| PP_SA2_15_30 | Permafrost Plateau | 15-30      | 72.334                          |
| PP_SA2_30_40 | Permafrost Plateau | 30-40      | 75.472                          |
| AM_JA2_15_30 | Active thaw margin | 15-30      | 77.31                           |
| PP_CH2_0_15  | Permafrost Plateau | 0-15       | 76.281                          |
| PP_CH2_15_30 | Permafrost Plateau | 15-30      | 59.542                          |
| PP_SD2_15_30 | Permafrost Plateau | 15-30      | 79.543                          |
| PP_JA1_0_15  | Permafrost Plateau | 0-15       | 69.574                          |
| AM_SA2_0_15  | Active thaw margin | 0-15       | 79.694                          |
| AM_SA2_30_45 | Active thaw margin | 30-45      | 59.27                           |
| PP_CH3_15_30 | Permafrost Plateau | 15-30      | 65.432                          |
| PP_CH3_30_40 | Permafrost Plateau | 30-40      | 79.694                          |
| AM_SD3_15_30 | Active thaw margin | 15-30      | 44.232                          |
| AM_SD3_30_40 | Active thaw margin | 30-40      | 42.367                          |
| AM_JA1_30_42 | Active thaw margin | 30-42      | 65.622                          |

|              |                    |       |        |
|--------------|--------------------|-------|--------|
| AM_SD2_0_15  | Active thaw margin | 0-15  | 42.054 |
| AM_SD2_15_30 | Active thaw margin | 15-30 | 67.116 |
| AM_SD2_30_45 | Active thaw margin | 30-45 | 46.989 |
| PP_SA4_0_15  | Permafrost Plateau | 0-15  | 73.831 |
| PP_SA4_15_30 | Permafrost Plateau | 15-30 | 69.629 |
| PP_SA4_30_50 | Permafrost Plateau | 30-50 | 63.403 |
| PP_SD4_0_15  | Permafrost Plateau | 0-15  | 54.675 |
| PP_SD4_15_25 | Permafrost Plateau | 15-25 | 55.886 |
| PP_JA4_0_15  | Permafrost Plateau | 0-15  | 66.742 |
| PP_JA4_15_30 | Permafrost Plateau | 15-30 | 50.358 |
| PP_JA4_30_40 | Permafrost Plateau | 30-40 | 59.872 |
| PP_SD3_0_15  | Permafrost Plateau | 0-15  | 48.456 |
| PP_SD3_15_30 | Permafrost Plateau | 15-30 | 70.931 |
| PP_CH1_15_30 | Permafrost Plateau | 15-30 | 79.729 |
| PP_CH1_30_50 | Permafrost Plateau | 30-50 | 76.663 |
| AM_CH2_30_45 | Active thaw margin | 30-45 | 63.909 |
| AM_CH1_15_30 | Active thaw margin | 15-30 | 6.203  |
| PP_C4_15_30  | Permafrost Plateau | 15-30 | 8.664  |
| PP_C2_0_15   | Permafrost Plateau | 0-15  | 97.604 |
| PP_SD1_15_30 | Permafrost Plateau | 15-30 | 89.326 |
| PP_SD1_30_45 | Permafrost Plateau | 30-45 | 94.024 |
| AM_CH1_30_50 | Active thaw margin | 30-50 | 85.929 |
| PP_JA3_15_30 | Permafrost Plateau | 15-30 | 87.656 |
| PP_JA2_0_15  | Permafrost Plateau | 0-15  | 104.59 |
| PP_C1_0_15   | Permafrost Plateau | 0-15  | 80.736 |
| AM_SA3_0_15  | Active thaw margin | 0-15  | 82.41  |
| AM_SA3_15_30 | Active thaw margin | 15-30 | 84.32  |
| AM_SA3_30_40 | Active thaw margin | 30-40 | 85.42  |
| AM_JA3_0_15  | Active thaw margin | 0-15  | 85.644 |
| AM_JA3_15_22 | Active thaw margin | 15-22 | 89.136 |
| AM_JA2_0_15  | Active thaw margin | 0-15  | 87.202 |
| AM_JA2_30_40 | Active thaw margin | 30-40 | 82.171 |
| PP_SD2_0_15  | Permafrost Plateau | 0-15  | 83.43  |
| PP_JA1_15_30 | Permafrost Plateau | 15-30 | 88.472 |
| PP_JA1_30_40 | Permafrost Plateau | 30-40 | 96.005 |
| PP_SA3_0_15  | Permafrost Plateau | 0-15  | 90.624 |
| PP_SA3_15_30 | Permafrost Plateau | 15-30 | 95.2   |
| PP_SA3_30_40 | Permafrost Plateau | 30-40 | 89.482 |
| AM_SA2_15_30 | Active thaw margin | 15-30 | 90.504 |
| PP_CH3_0_15  | Permafrost Plateau | 0-15  | 93.775 |
| AM_SD3_0_15  | Active thaw margin | 0-15  | 84.909 |
| AM_JA1_0_15  | Active thaw margin | 0-15  | 88.469 |

|              |                    |       |         |
|--------------|--------------------|-------|---------|
| AM_JA1_15_30 | Active thaw margin | 15-30 | 82.938  |
| PP_CH1_0_15  | Permafrost Plateau | 0-15  | 119.628 |
| AM_CH2_0_15  | Active thaw margin | 0-15  | 80.762  |
| AM_CH2_15_30 | Active thaw margin | 15-30 | 85.987  |
| AM_CH3_0_15  | Active thaw margin | 0-15  | 101.812 |
| AM_CH3_15_30 | Active thaw margin | 15-30 | 88.081  |
| AM_CH3_30_38 | Active thaw margin | 30-38 | 90.964  |
| PP_SA1_0_15  | Permafrost Plateau | 0-15  | 19.8    |
| AM_SA1_15_30 | Active thaw margin | 15-30 | 22.8    |
| AM_SA1_30_42 | Active thaw margin | 30-42 | 27.4    |

Qubit data results mcra

| Sample ID   | Site               | Depth (cm) | DNA concentration (ng/ $\mu$ L) |
|-------------|--------------------|------------|---------------------------------|
| AMCH1 0-15  | Active thaw margin | 0-15       | 8.818                           |
| AMCH1 15-30 | Active thaw margin | 15-30      | 6.547                           |
| PPSA3 30-40 | Permafrost plateau | 30-40      | 2.731                           |
| PPSD1 15-30 | Permafrost plateau | 15-30      | 2.071                           |
| PPSD3 15-30 | Permafrost plateau | 15-30      | 5.447                           |
| AMCH1 30-50 | Active thaw margin | 30-50      | 4.808                           |
| PPSA4 30-50 | Permafrost plateau | 30-50      | 4.588                           |
| PPSD1 0-15  | Permafrost plateau | 0-15       | 2.415                           |
| PPSD1 30-45 | Permafrost plateau | 30-45      | 7.019                           |
| PPSA2 30-40 | Permafrost plateau | 30-40      | 2.845                           |
| PPC2 0-15   | Permafrost plateau | 0-15       | 2.248                           |
| PPCH1 15-30 | Permafrost plateau | 15-30      | 3.767                           |
| AMSD2 30-45 | Active thaw margin | 30-45      | 4.897                           |
| AMSD1 15-30 | Active thaw margin | 15-30      | 4.857                           |
| PPC1 15-30  | Permafrost plateau | 15-30      | 2.767                           |
| AMSA3 15-30 | Active thaw margin | 15-30      | 3.252                           |
| PPCH4 0-15  | Permafrost plateau | 0-15       | 2.518                           |
| PPC1 30-40  | Permafrost plateau | 30-40      | 5.542                           |
| PPJA1 30-40 | Permafrost plateau | 30-40      | 3.784                           |
| AMJA1 15-30 | Active thaw margin | 15-30      | 8.412                           |
| AMJA3 0-15  | Active thaw margin | 0-15       | 11.327                          |
| AMSD2 0-15  | Active thaw margin | 0-15       | 9.85                            |
| PPSA2 15-30 | Permafrost plateau | 15-30      | 2.4                             |
| AMCH2 30-45 | Active thaw margin | 30-45      | 3.139                           |
| AMJA3 15-22 | Active thaw margin | 15-22      | 16.039                          |
| AMCH3 15-30 | Active thaw margin | 15-30      | 10.614                          |
| AMJA1 30-42 | Active thaw margin | 30-42      | 7.853                           |
| AMSA1 30-42 | Active thaw margin | 30-42      | 14.089                          |

|              |                    |       |        |
|--------------|--------------------|-------|--------|
| PPSD4 0-15   | Permafrost plateau | 0-15  | 8.756  |
| AMCH3 30-38  | Active thaw margin | 30-38 | 9.056  |
| AMCH3 0-15   | Active thaw margin | 0-15  | 10.986 |
| AMSA2 15-30  | Active thaw margin | 15-30 | 4.43   |
| AMCH2 15-300 | Active thaw margin | 15-30 | 6.255  |
| AMSA1 15-30  | Active thaw margin | 15-30 | 2.872  |
| PPSD4 15-25  | Permafrost plateau | 15-25 | 2.312  |
| AMSA3 0-15   | Active thaw margin | 0-15  | 3.52   |
| PPJA3 15-30  | Permafrost plateau | 15-30 | 3.794  |
| PPCH1 30-50  | Permafrost plateau | 30-50 | 2.946  |
| AMSD2 15-30  | Active thaw margin | 15-30 | 6.069  |
| PPC3 15-30   | Permafrost plateau | 15-30 | 3.837  |
| PPJA4 15-30  | Permafrost plateau | 15-30 | 4.884  |
| AMCH2 0-15   | Active thaw margin | 0-15  | 4.635  |
| AMSD1 0-15   | Active thaw margin | 0-15  | 6.022  |
| AMJA1 0-15   | Active thaw margin | 0-15  | 2.519  |
| AMSA1 0-15   | Active thaw margin | 0-15  | 3.062  |
| PPJA3 30-38  | Permafrost plateau | 30-38 | 2.128  |
| PPCH4 30-35  | Permafrost plateau | 30-35 | 3.013  |
| AMSD1 30-42  | Active thaw margin | 30-42 | 5.162  |
| PPJA2 15-25  | Permafrost plateau | 15-25 | 4.992  |
| PPSD2 15-30  | Permafrost plateau | 15-30 | 1.505  |
| AMSD3 15-30  | Active thaw margin | 15-30 | 1.447  |
| PPJA1 0-15   | Permafrost plateau | 0-15  | 1.779  |
| AMSA3 30-40  | Active thaw margin | 30-40 | 4.914  |
| AMJA2 30-40  | Active thaw margin | 30-40 | 4.149  |
| PPC4 30-35   | Permafrost plateau | 30-35 | 2.217  |
| AMSA2 30-45  | Active thaw margin | 30-45 | 3.891  |
| PPJA4 30-40  | Permafrost plateau | 30-40 | 10.295 |
| AMJA2 15-30  | Active thaw margin | 15-30 | 5.246  |
| AMSD3 0-15   | Active thaw margin | 0-15  | 5.737  |
| AMSA2 0-15   | Active thaw margin | 0-15  | 2.121  |
| PPSD2 30-27  | Permafrost plateau | 30-37 | 2.684  |
| PPCH3 30-40  | Permafrost plateau | 30-40 | 3.415  |
| PPSD3 0-15   | Permafrost plateau | 0-15  | 3.165  |
| PPJA1 15-30  | Permafrost plateau | 15-30 | 7.421  |
| AMJA2 0-15   | Active thaw margin | 0-15  | 5.878  |
| PPSD2 0-15   | Permafrost plateau | 0-15  | 3.783  |
| PPC4 15-30   | Permafrost plateau | 15-30 | 7.299  |
| PPSA1 0-15   | Permafrost plateau | 0-15  | 4.464  |
| PPCH3 15-30  | Permafrost plateau | 15-30 | 2.299  |
| PPSA3 0-15   | Permafrost plateau | 0-15  | 3.762  |

|             |                    |       |       |
|-------------|--------------------|-------|-------|
| PPCH2 15-30 | Permafrost plateau | 15-30 | 1.783 |
| PPSD3 30-45 | Permafrost plateau | 30-45 | 2.789 |
| PPSA4 15-30 | Permafrost plateau | 15-30 | 4.733 |
| PPSA3 15-30 | Permafrost plateau | 15-30 | 2.762 |
| PPCH3 0-15  | Permafrost plateau | 0-15  | 2.928 |
| PPSA1 15-30 | Permafrost plateau | 15-30 | 5.987 |
| PPSA4 0-15  | Permafrost plateau | 0-15  | 2.654 |
| PPJA2 0-15  | Permafrost plateau | 0-15  | 2.353 |
| AMSD3 30-40 | Active thaw margin | 30-40 | 1.773 |
| PPCH4 15-30 | Permafrost plateau | 15-30 | 5.565 |
| PPC1 0-15   | Permafrost plateau | 0-15  | 2.042 |
| PPJA3 0-15  | Permafrost plateau | 0-15  | 4.904 |
| PPC3 0-15   | Permafrost plateau | 0-15  | 2.115 |
| PPC4 0-15   | Permafrost plateau | 0-15  | 6.256 |
| PPC2 15-25  | Permafrost plateau | 15-25 | 0.929 |
| PPCH1 0-15  | Permafrost plateau | 0-15  | 0.967 |
| PPJA4 0-15  | Permafrost plateau | 0-15  | 1.468 |
| PPSA2 0-15  | Permafrost plateau | 0-15  | 2.127 |
| PPCH2 0-15  | Permafrost plateau | 0-15  | 2.74  |

## References

Glenn, T. C., Nilsen, R. A., Kieran, T. J., Sanders, J. G., Bayona-Vásquez, N. J., Finger, J. W., Pierson, T. W., Bentley, K. E., Hoffberg, S. L., Louha, S., Garcia-De Leon, F. J., Del Rio Portilla, M. A., Reed, K. D., Anderson, J. L., Meece, J. K., Aggrey, S. E., Rekaya, R., Alabady, M., Belanger, M., Winker, K., and Faircloth, B. C.: Adapterama I: universal stubs and primers for 384 unique dual-indexed or 147,456 combinatorially-indexed Illumina libraries (iTru & iNext), *PeerJ*, 7, e7755, <https://doi.org/10.7717/peerj.7755>, 2019.
